# Supplementary material for: Distinct activity of the bone-targeted gallium compound KP46 against osteosarcoma cells - synergism with autophagy inhibition
Source: PubMed Central journal article supplement (PMC5389188; doi:10.1186/s13046-017-0527-z), 2017-04-12
Supplement: 13046_2017_527_MOESM1_ESM.pdf [file 13046_2017_527_MOESM1_ESM.pdf]

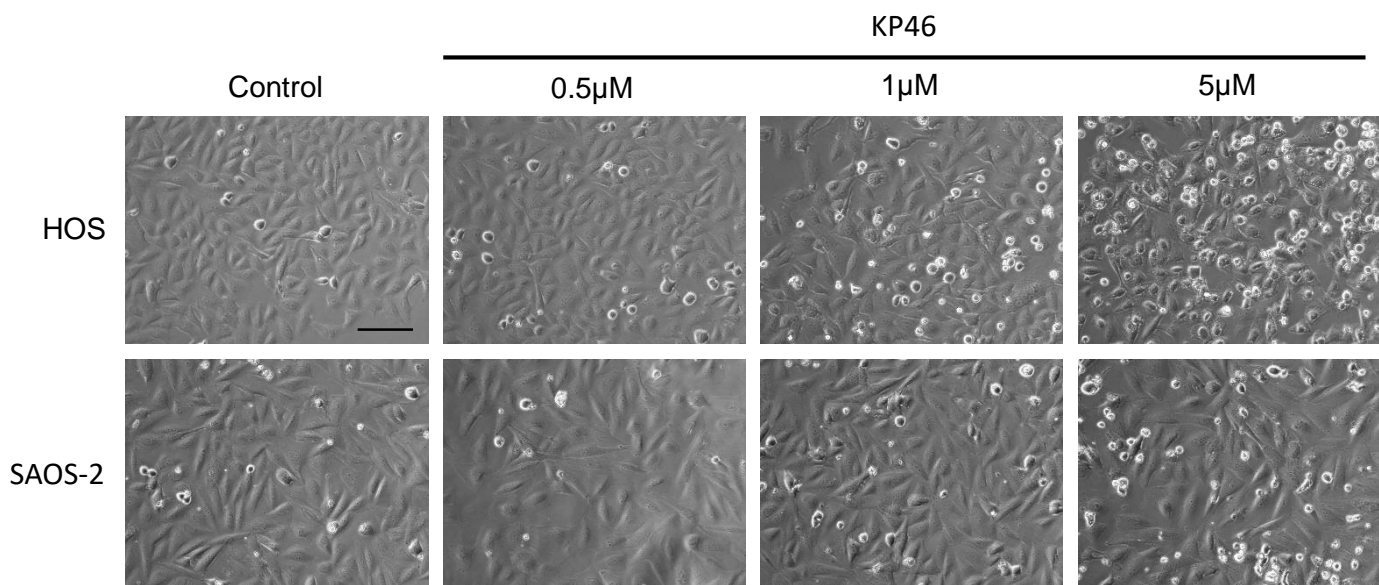

Additional file 1 Figure S-1
